# Supplementary material
Source: Springer Nature journal article supplement (https://www.springermedizin.de/resource/supplementary/12960_2013_386_MOESM7_ESM.pdf/9569990)
Supplement: MOESM7 [file 9569990]

Records identified  
through database  
searching (n = 2258)

Records identified  
through other sources  
(n=9)

Total number of articles and reports obtained (n=2267)

Records excluded on screening  
title and abstract, and  
duplicates (n =2191)

Articles deemed eligible for full text screening (n = 76)

Records excluded on screening  
full text (n = 33)

Records included (n = 43)  
Background Papers (n = 6)  
Primary and Secondary Studies (n = 37)
